# Supplementary material
Source: PubMed Central journal article supplement (PMC1177383)
Supplement: pnas_0503357102_7.pdf [file pnas_0503357102_7.pdf]

# TeraGenomics

Print Close Window

## Chip Metadata: 129:4-3 + 4-4 PAG

### General Information

|                |                                                 |                           |                        |
|----------------|-------------------------------------------------|---------------------------|------------------------|
| Scientist      | Hovatta, Iris                                   |                           |                        |
| Project(s)     | Publications Mouse Brain and Body Map           | Laboratory                | Salk-Barlow laboratory |
| Chip Type      | MG_U74Av2                                       | Chip Lot #                | 2001938                |
| Chip Exp Date  | 1/12/2004                                       | Sample ID                 | 129:4-3 + 4-4 PAG      |
| Sample Pooling | Sample is pooled, with 2 Identical Individuals. | Absolute Analysis Type(s) | Lockhart-Barlow        |

### Sample Information

|                                   |                                                   |                        |         |
|-----------------------------------|---------------------------------------------------|------------------------|---------|
| Sample Pooled Ratio               | 1                                                 |                        |         |
| Genus, Species, Subspecies/Strain | Mus » musculus » Inbred » Taconic » 129S6/SvEvTac |                        |         |
| Sex                               | Male                                              |                        |         |
| Birth Date                        | Unknown                                           | Sample Collection Date | Unknown |
| Age/Stage                         | 56 Days                                           |                        |         |
| Genotype                          | Wild Type                                         |                        |         |
| Trait / Disease                   | Within Normal Limits                              |                        |         |
| Treatment / Handling / Exposure   |                                                   |                        |         |

### RNA Information

|                       |                                                                                                                                                                                                                                                          |                        |           |
|-----------------------|----------------------------------------------------------------------------------------------------------------------------------------------------------------------------------------------------------------------------------------------------------|------------------------|-----------|
| Sample RNA Origin     | Tissue » Microscopic Dissection » Hand Dissection » MIDBRAIN [MB] » CEREBRAL PEDUNCLE [CP] » MIDBRAIN TEGMENTUM [MTg] » central gray substance of midbrain [CGMB] » left and right » Y: Anterior-Posterior from (Bregma or Intra-aural) » -2.54 to -5.02 |                        |           |
| RNA Extraction Date   | 3/12/2002                                                                                                                                                                                                                                                | RNA Type               | Total RNA |
| Total RNA Yield       | 15.4 µg                                                                                                                                                                                                                                                  | RNA Conc. Water        | 1.5 µg/µl |
| RNA 260/280 in TE     | 2                                                                                                                                                                                                                                                        | Date Labeling Complete | 4/23/2002 |
| RNA Amp Method        | Barlow Lab Protocol                                                                                                                                                                                                                                      | Amp Rounds             | 1 Round   |
| Starting RNA Quantity | 10 µg                                                                                                                                                                                                                                                    | cRNA Yield             | 100 µg/µl |
| cRNA Conc. In Hyb     | 0.06 µg/µl                                                                                                                                                                                                                                               |                        |           |

### Hybridization Information

|            |                 |                         |          |
|------------|-----------------|-------------------------|----------|
| Hyb Method | Rotated - 13rpm | Hyb Vol in Chip         | Full     |
| Hyb Temp   | 50° C           | Hyb Time                | 16 hours |
| Hyb Date   | 4/29/2002       | No. of Times Hybridized | 1        |

### Washes, Stains & Antibodies

|                           |              |                           |              |
|---------------------------|--------------|---------------------------|--------------|
| Wash Station              | Megawasher   | Wash 1 (cycle x mix-wash) | 5x3 6xSSPE-T |
| Hi Strin Wash             | 0.1xMES      | Hi Strin Temp             | 45° C        |
| Hi Strin Time (min)       | 30 min       | Stain 1                   | SAPE         |
| Stain 1 Temp              | 37° C        | Stain 1 Time (min)        | 15 min       |
| Wash 2 (cycle x mix-wash) | 5x3 6xSSPE-T | Antibody                  | Yes          |
| Antibody Temp             | 37° C        | Antibody Time (min)       | 30           |
| Wash 3 (cycle x mix-wash) | 5x3 6xSSPE-T | Stain 2                   | SAPE         |
| Stain 2 Temp              | 37° C        | Stain 2 Time (min)        | 15 min       |
| Wash 4 (cycle x mix-wash) | 5x3 6xSSPE-T |                           |              |

### Scan Information

|             |       |            |     |
|-------------|-------|------------|-----|
| Scan Buffer | 1xMES | Scanner ID | FGL |
|-------------|-------|------------|-----|

|                      |                                                                                 |                        |   |
|----------------------|---------------------------------------------------------------------------------|------------------------|---|
| <b>Scan Criteria</b> | Pixel Size: 3 microns<br>Detection Wavelength: 570 nm<br>Scan Speed: 10 minutes | <b>Number of Scans</b> | 1 |
| <b>Scanned Date</b>  | 4/30/2002                                                                       |                        |   |

 **Comments**

|                                                 |      |
|-------------------------------------------------|------|
| <b>Any .DAT problems with Snow?</b>             | None |
| <b>Any .DAT problems with Scratches?</b>        | None |
| <b>Any .DAT problems with Bubbles?</b>          | None |
| <b>Any .DAT problems with Glue?</b>             | None |
| <b>Any .DAT problems with Bright Spots?</b>     | None |
| <b>Any .DAT problems with Dark Spots?</b>       | None |
| <b>Any other .DAT image problems?</b>           | None |
| <b>Were there problems with the experiment?</b> | None |
| <b>General Comments</b>                         | None |

 **Barlow-Lockhart Absolute Chip Summary Information**

|                       |        |                             |       |
|-----------------------|--------|-----------------------------|-------|
| <b>ProbeSet Count</b> | 12488  | <b>Filtered PS Count</b>    | 12422 |
| <b>Background Avg</b> | 64.25  | <b>Background SD</b>        | 1.53  |
| <b>Num Outliers</b>   | 92     | <b>Raw Q</b>                | 2.30  |
| <b>Scaling Factor</b> | 1.40   | <b>Scaling Target Value</b> | 200   |
| <b>Actin (3'/5')</b>  | 1.50   | <b>Gapdh (3'/5')</b>        | 0.94  |
| <b>Percent P</b>      | 46.84% | <b>Percent M</b>            | 6.57% |
| <b>Percent RP</b>     | 0.98%  |                             |       |

 **Associated Media**

|                                         |                      |                           |
|-----------------------------------------|----------------------|---------------------------|
| <b>Barlowlab 1rnd protocol (tissue)</b> | Adobe PDF File (pdf) | <a href="#">View File</a> |
|-----------------------------------------|----------------------|---------------------------|
