# Supplementary material
Source: PubMed Central journal article supplement (PMC1177383)
Supplement: pnas_0503357102_9.pdf [file pnas_0503357102_9.pdf]

# TeraGenomics

[Print](#) [Close Window](#)

## Chip Metadata: B6:19-8 medulla

 **General Information**

|                |                                       |                           |                   |
|----------------|---------------------------------------|---------------------------|-------------------|
| Scientist      | Wodicka, Lisa                         |                           |                   |
| Project(s)     | Publications Mouse Brain and Body Map | Laboratory                | Barlow Laboratory |
| Chip Type      | MG_U74Av2                             | Chip Lot #                | 3004035           |
| Chip Exp Date  | 9/6/2004                              | Sample ID                 | B6:19-8 medulla   |
| Sample Pooling | Sample is not pooled.                 | Absolute Analysis Type(s) | Lockhart-Barlow   |

 **Sample Information**

|                                   |                                                   |                        |           |
|-----------------------------------|---------------------------------------------------|------------------------|-----------|
| Sample Pooled Ratio               | 1                                                 |                        |           |
| Genus, Species, Subspecies/Strain | Mus » musculus » Inbred » Jackson Labs » C57BL/6J |                        |           |
| Sex                               | Male                                              |                        |           |
| Birth Date                        | 6/25/2003                                         | Sample Collection Date | 8/21/2003 |
| Age/Stage                         | 57 Days                                           |                        |           |
| Genotype                          | WildType                                          |                        |           |
| Trait / Disease                   | Within Normal Limits                              |                        |           |
| Treatment / Handling / Exposure   |                                                   |                        |           |

 **RNA Information**

|                       |                                                                                                                                                                                   |                        |           |
|-----------------------|-----------------------------------------------------------------------------------------------------------------------------------------------------------------------------------|------------------------|-----------|
| Sample RNA Origin     | Tissue » Microscopic Dissection » Hand Dissection » HINDBRAIN [HB] » MEDULLA OBLONGATA [MO] » left and right » Y: Anterior-Posterior from (Bregma or Intra-aural) » -5.5 to -8.25 |                        |           |
| RNA Extraction Date   | 9/24/2003                                                                                                                                                                         | RNA Type               | Total RNA |
| Total RNA Yield       | 34 µg                                                                                                                                                                             | RNA Conc. Water        | 1.7 µg/µl |
| RNA 260/280 in TE     | 2.15                                                                                                                                                                              | Date Labeling Complete | 10/2/2003 |
| RNA Amp Method        | Barlow Lab Protocol                                                                                                                                                               | Amp Rounds             | 1 Round   |
| Starting RNA Quantity | 10 µg                                                                                                                                                                             | cRNA Yield             | 95 µg/µl  |
| cRNA Conc. In Hyb     | 0.06 µg/µl                                                                                                                                                                        |                        |           |

 **Hybridization Information**

|            |                 |                         |          |
|------------|-----------------|-------------------------|----------|
| Hyb Method | Rotated - 13rpm | Hyb Vol in Chip         | Full     |
| Hyb Temp   | 50° C           | Hyb Time                | 16 hours |
| Hyb Date   | 10/16/2003      | No. of Times Hybridized | 1        |

 **Washes, Stains & Antibodies**

|                           |              |                           |              |
|---------------------------|--------------|---------------------------|--------------|
| Wash Station              | Megawasher   | Wash 1 (cycle x mix-wash) | 5x3 6xSSPE-T |
| Hi Strin Wash             | 0.1xMES      | Hi Strin Temp             | 45° C        |
| Hi Strin Time (min)       | 30 min       | Stain 1                   | SAPE         |
| Stain 1 Temp              | 37° C        | Stain 1 Time (min)        | 15 min       |
| Wash 2 (cycle x mix-wash) | 5x3 6xSSPE-T | Antibody                  | Yes          |
| Antibody Temp             | 37° C        | Antibody Time (min)       | 30           |
| Wash 3 (cycle x mix-wash) | 5x3 6xSSPE-T | Stain 2                   | SAPE         |
| Stain 2 Temp              | 37° C        | Stain 2 Time (min)        | 15 min       |
| Wash 4 (cycle x mix-wash) | 5x3 6xSSPE-T |                           |              |

 **Scan Information**

|               |                                                       |                 |                   |
|---------------|-------------------------------------------------------|-----------------|-------------------|
| Scan Buffer   | 1xMES                                                 | Scanner ID      | GeneArray Scanner |
| Scan Criteria | Pixel Size: 3 microns<br>Detection Wavelength: 570 nm | Number of Scans | 1                 |

|              |                        |  |  |
|--------------|------------------------|--|--|
|              | Scan Speed: 10 minutes |  |  |
| Scanned Date | 10/17/2003             |  |  |

**Comments**

|                                          |      |
|------------------------------------------|------|
| Any .DAT problems with Snow?             | None |
| Any .DAT problems with Scratches?        | None |
| Any .DAT problems with Bubbles?          | None |
| Any .DAT problems with Glue?             | None |
| Any .DAT problems with Bright Spots?     | None |
| Any .DAT problems with Dark Spots?       | None |
| Any other .DAT image problems?           | None |
| Were there problems with the experiment? | None |
| General Comments                         | None |

**Barlow-Lockhart Absolute Chip Summary Information**

|                |        |                      |       |
|----------------|--------|----------------------|-------|
| ProbeSet Count | 12488  | Filtered PS Count    | 12422 |
| Background Avg | 53.49  | Background SD        | 1.40  |
| Num Outliers   | 89     | Raw Q                | 1.94  |
| Scaling Factor | 1.55   | Scaling Target Value | 200   |
| Actin (3'/5')  | 1.44   | Gapdh (3'/5')        | 0.85  |
| Percent P      | 48.50% | Percent M            | 6.55% |
| Percent RP     | 0.72%  |                      |       |

**Associated Media**

|                                  |                      |                           |
|----------------------------------|----------------------|---------------------------|
| Barlowlab 1rnd protocol (tissue) | Adobe PDF File (pdf) | <a href="#">View File</a> |
| Pons-Medulla (PDF)               | Adobe PDF File (pdf) | <a href="#">View File</a> |
