# Supplementary material
Source: PubMed Central journal article supplement (PMC1177383)
Supplement: pnas_0503357102_10.pdf [file pnas_0503357102_10.pdf]

## TeraGenomics

Print Close Window

## Chip Metadata: BL6: 4-1 + 4-2 hypothalamus

 General Information

|                |                                                 |                           |                             |
|----------------|-------------------------------------------------|---------------------------|-----------------------------|
| Scientist      | Hovatta, Iris                                   |                           |                             |
| Project(s)     | Publications Mouse Brain and Body Map           | Laboratory                | Salk-Barlow laboratory      |
| Chip Type      | MG_U74Av2                                       | Chip Lot #                | 2001938                     |
| Chip Exp Date  | 1/9/2004                                        | Sample ID                 | BL6: 4-1 + 4-2 hypothalamus |
| Sample Pooling | Sample is pooled, with 2 Identical Individuals. | Absolute Analysis Type(s) | Lockhart-Barlow             |

 Sample Information

|                                   |                                                   |                        |         |
|-----------------------------------|---------------------------------------------------|------------------------|---------|
| Sample Pooled Ratio               | 1                                                 |                        |         |
| Genus, Species, Subspecies/Strain | Mus » musculus » Inbred » Jackson Labs » C57BL/6J |                        |         |
| Sex                               | Male                                              |                        |         |
| Birth Date                        | Unknown                                           | Sample Collection Date | Unknown |
| Age/Stage                         | 56 Days                                           |                        |         |
| Genotype                          | Wild Type                                         |                        |         |
| Trait / Disease                   | Within Normal Limits                              |                        |         |
| Treatment / Handling / Exposure   |                                                   |                        |         |

 RNA Information

|                       |                                                                                                                                                                                                                                                                                                                                                                                                                                                                                                                                                                                                                                                                                                                                                                                                                                                                                                                                                                                                                                                                                                                                                                                                                                                                                                                                                                                                                                                                                                                                                                                                                                                                                                                                                                                                                                                                                                                                                                                                                                                                                                                                                                                                                                                                                                                                                                                                                                                           |                        |           |
|-----------------------|-----------------------------------------------------------------------------------------------------------------------------------------------------------------------------------------------------------------------------------------------------------------------------------------------------------------------------------------------------------------------------------------------------------------------------------------------------------------------------------------------------------------------------------------------------------------------------------------------------------------------------------------------------------------------------------------------------------------------------------------------------------------------------------------------------------------------------------------------------------------------------------------------------------------------------------------------------------------------------------------------------------------------------------------------------------------------------------------------------------------------------------------------------------------------------------------------------------------------------------------------------------------------------------------------------------------------------------------------------------------------------------------------------------------------------------------------------------------------------------------------------------------------------------------------------------------------------------------------------------------------------------------------------------------------------------------------------------------------------------------------------------------------------------------------------------------------------------------------------------------------------------------------------------------------------------------------------------------------------------------------------------------------------------------------------------------------------------------------------------------------------------------------------------------------------------------------------------------------------------------------------------------------------------------------------------------------------------------------------------------------------------------------------------------------------------------------------------|------------------------|-----------|
| Sample RNA Origin     | <p>Tissue » Microscopic Dissection » Hand Dissection » BRAIN » FOREBRAIN [FB] » DIENCEPHALON [DiE] » dorsal hypothalamic area [DH] » left and right » Y: Anterior-Posterior from (Bregma or Intra-aural) » 0 to -3.25</p> <p>Tissue » Microscopic Dissection » Hand Dissection » BRAIN » FOREBRAIN [FB] » DIENCEPHALON [DiE] » HYPOTHALAMUS [Hy] » ANTERIOR HYPOTHALAMIC REGION [AHR] » left and right » Y: Anterior-Posterior from (Bregma or Intra-aural) » 0 to -3.25</p> <p>NA</p> <p>Tissue » Microscopic Dissection » Hand Dissection » BRAIN » FOREBRAIN [FB] » DIENCEPHALON [DiE] » HYPOTHALAMUS [Hy] » arcuate nucleus of hypothalamus [Arch] » left and right » Y: Anterior-Posterior from (Bregma or Intra-aural) » 0 to -3.25</p> <p>Tissue » Microscopic Dissection » Hand Dissection » BRAIN » FOREBRAIN [FB] » DIENCEPHALON [DiE] » HYPOTHALAMUS [Hy] » dorsomedial nucleus of hypothalamus [DMH] » left and right » Y: Anterior-Posterior from (Bregma or Intra-aural) » 0 to -3.25</p> <p>Tissue » Microscopic Dissection » Hand Dissection » BRAIN » FOREBRAIN [FB] » DIENCEPHALON [DiE] » HYPOTHALAMUS [Hy] » INTERMEDIATE HYPOTHALAMIC REGION [IHR] » left and right » Y: Anterior-Posterior from (Bregma or Intra-aural) » 0 to -3.25</p> <p>Tissue » Microscopic Dissection » Hand Dissection » BRAIN » FOREBRAIN [FB] » DIENCEPHALON [DiE] » HYPOTHALAMUS [Hy] » retrochiasmatic area [RCh] » left and right » Y: Anterior-Posterior from (Bregma or Intra-aural) » 0 to -3.25</p> <p>Tissue » Microscopic Dissection » Hand Dissection » BRAIN » FOREBRAIN [FB] » DIENCEPHALON [DiE] » HYPOTHALAMUS [Hy] » ventromedial nucleus of hypothalamus [VMH] » left and right » Y: Anterior-Posterior from (Bregma or Intra-aural) » 0 to -3.25</p> <p>Tissue » Microscopic Dissection » Hand Dissection » BRAIN » FOREBRAIN [FB] » DIENCEPHALON [DiE] » LATERAL HYPOTHALAMIC AREA [LH] » left and right » Y: Anterior-Posterior from (Bregma or Intra-aural) » 0 to -3.25</p> <p>Tissue » Microscopic Dissection » Hand Dissection » BRAIN » FOREBRAIN [FB] » DIENCEPHALON [DiE] » medial forebrain bundle [mfb] » left and right » Y: Anterior-Posterior from (Bregma or Intra-aural) » 0 to -3.25</p> <p>Tissue » Microscopic Dissection » Hand Dissection » BRAIN » FOREBRAIN [FB] » DIENCEPHALON [DiE] » POSTERIOR HYPOTHALAMIC REGION [PHR] » left and right » Y: Anterior-Posterior from (Bregma or Intra-aural) » 0 to -3.25</p> |                        |           |
| RNA Extraction Date   | 2/19/2002                                                                                                                                                                                                                                                                                                                                                                                                                                                                                                                                                                                                                                                                                                                                                                                                                                                                                                                                                                                                                                                                                                                                                                                                                                                                                                                                                                                                                                                                                                                                                                                                                                                                                                                                                                                                                                                                                                                                                                                                                                                                                                                                                                                                                                                                                                                                                                                                                                                 | RNA Type               | Total RNA |
| Total RNA Yield       | 19.1 µg                                                                                                                                                                                                                                                                                                                                                                                                                                                                                                                                                                                                                                                                                                                                                                                                                                                                                                                                                                                                                                                                                                                                                                                                                                                                                                                                                                                                                                                                                                                                                                                                                                                                                                                                                                                                                                                                                                                                                                                                                                                                                                                                                                                                                                                                                                                                                                                                                                                   | RNA Conc. Water        | 1.3 µg/µl |
| RNA 260/280 in TE     | 2.05                                                                                                                                                                                                                                                                                                                                                                                                                                                                                                                                                                                                                                                                                                                                                                                                                                                                                                                                                                                                                                                                                                                                                                                                                                                                                                                                                                                                                                                                                                                                                                                                                                                                                                                                                                                                                                                                                                                                                                                                                                                                                                                                                                                                                                                                                                                                                                                                                                                      | Date Labeling Complete | 4/5/2002  |
| RNA Amp Method        | Barlow Lab Protocol                                                                                                                                                                                                                                                                                                                                                                                                                                                                                                                                                                                                                                                                                                                                                                                                                                                                                                                                                                                                                                                                                                                                                                                                                                                                                                                                                                                                                                                                                                                                                                                                                                                                                                                                                                                                                                                                                                                                                                                                                                                                                                                                                                                                                                                                                                                                                                                                                                       | Amp Rounds             | 1 Round   |
| Starting RNA Quantity | 10 µg                                                                                                                                                                                                                                                                                                                                                                                                                                                                                                                                                                                                                                                                                                                                                                                                                                                                                                                                                                                                                                                                                                                                                                                                                                                                                                                                                                                                                                                                                                                                                                                                                                                                                                                                                                                                                                                                                                                                                                                                                                                                                                                                                                                                                                                                                                                                                                                                                                                     | cRNA Yield             | 110 µg/µl |
| cRNA Conc. In Hyb     | 0.06 µg/µl                                                                                                                                                                                                                                                                                                                                                                                                                                                                                                                                                                                                                                                                                                                                                                                                                                                                                                                                                                                                                                                                                                                                                                                                                                                                                                                                                                                                                                                                                                                                                                                                                                                                                                                                                                                                                                                                                                                                                                                                                                                                                                                                                                                                                                                                                                                                                                                                                                                |                        |           |

**Hybridization Information**

|            |                 |                         |          |
|------------|-----------------|-------------------------|----------|
| Hyb Method | Rotated - 13rpm | Hyb Vol in Chip         | Full     |
| Hyb Temp   | 50° C           | Hyb Time                | 16 hours |
| Hyb Date   | 4/18/2002       | No. of Times Hybridized | 1        |

 **Washes, Stains & Antibodies**

|                           |              |                           |              |
|---------------------------|--------------|---------------------------|--------------|
| Wash Station              | Megawasher   | Wash 1 (cycle x mix-wash) | 5x3 6xSSPE-T |
| Hi Strin Wash             | 0.1xMES      | Hi Strin Temp             | 45° C        |
| Hi Strin Time (min)       | 30 min       | Stain 1                   | SAPE         |
| Stain 1 Temp              | 37° C        | Stain 1 Time (min)        | 15 min       |
| Wash 2 (cycle x mix-wash) | 5x3 6xSSPE-T | Antibody                  | Yes          |
| Antibody Temp             | 37° C        | Antibody Time (min)       | 30           |
| Wash 3 (cycle x mix-wash) | 5x3 6xSSPE-T | Stain 2                   | SAPE         |
| Stain 2 Temp              | 37° C        | Stain 2 Time (min)        | 15 min       |
| Wash 4 (cycle x mix-wash) | 5x3 6xSSPE-T |                           |              |

 **Scan Information**

|               |                                                                                 |                 |     |
|---------------|---------------------------------------------------------------------------------|-----------------|-----|
| Scan Buffer   | 1xMES                                                                           | Scanner ID      | FGL |
| Scan Criteria | Pixel Size: 3 microns<br>Detection Wavelength: 570 nm<br>Scan Speed: 10 minutes | Number of Scans | 1   |
| Scanned Date  | 4/19/2002                                                                       |                 |     |

 **Comments**

|                                          |      |
|------------------------------------------|------|
| Any .DAT problems with Snow?             | None |
| Any .DAT problems with Scratches?        | None |
| Any .DAT problems with Bubbles?          | None |
| Any .DAT problems with Glue?             | None |
| Any .DAT problems with Bright Spots?     | None |
| Any .DAT problems with Dark Spots?       | None |
| Any other .DAT image problems?           | None |
| Were there problems with the experiment? | None |
| General Comments                         | None |

 **Barlow-Lockhart Absolute Chip Summary Information**

|                |        |                      |       |
|----------------|--------|----------------------|-------|
| ProbeSet Count | 12488  | Filtered PS Count    | 12422 |
| Background Avg | 98.46  | Background SD        | 4.23  |
| Num Outliers   | 149    | Raw Q                | 2.91  |
| Scaling Factor | 1.14   | Scaling Target Value | 200   |
| Actin (3'/5')  | 1.72   | Gapdh (3'/5')        | 0.92  |
| Percent P      | 54.32% | Percent M            | 6.29% |
| Percent RP     | 0.47%  |                      |       |

 **Associated Media**

|                                  |                      |                           |
|----------------------------------|----------------------|---------------------------|
| Barlowlab 1rnd protocol (tissue) | Adobe PDF File (pdf) | <a href="#">View File</a> |
| Hypothalamus Dissection (PDF)    | Adobe PDF File (pdf) | <a href="#">View File</a> |
